# Supplementary material for: CIDEA Transcriptionally Regulates UCP1 for Britening and Thermogenesis in Human Fat Cells
Source: PubMed Central journal article supplement — iScience. 2019 Sep 13;20:73–89. doi: 10.1016/j.isci.2019.09.011 (PMC6817690; doi:10.1016/j.isci.2019.09.011), 2019-09-13
Supplement: mmc2.pdf [file mmc2.pdf]

**Data S1, Related to Figures 1-6: mRNA template sequences (+ve strand)**

**Cas9D10ANLS-2A-Puromycin ( GenBank accession number: MG694578)**

T7 Promoter
5'UTR Human beta globin
Cas9D10A

```

TTGGACCCCTCGTACAGAAGCTAATACGACTCACTATAAGGACATTTGCTTCTGACACAACCTGTGTTCACTAGCAACCTCAAACAGACACCATGGACAAGAAGT
ACTCCATTGGGCTCGCTATCGGCACAAACAGCGTCCGGTGGGCGCTCATTACGGACGAGTACAAGGTGCCGAGCAAAAAATTCAAAGTTCTGGGCAATACCGA
TCGCCACAGCATAAAGAAGAACCTCATTGGCGCCCTCTGTTCGACTCCGGGGAGACGGCCGAAGCCACGCGGCTCAAAGAAGACAGCAGCGCCGAGATATAC
CGCAGAAAGAATCGGATCTGTACCTGCAGGAGATCTTTAGTAATGAGATGGCTAAGGTGGATGACTCTTTCTCCATAGGCTGGAGGAGTCTTTTTGGTGGA
GGAGGATAAAAAGCAGGACGCCCAATCTTTGGCAATATCGTGACGAGGTGGCGTACCATGAAAAGTACCCAACCATATATCATCTGAGGAAGAAGCTT
GTAGACAGTACTGATAAGGCTGACTTGCAGTCTATCTCGCGCTGGCGCATATGATCAAATTTGGGGGACACTTCTCATCGAGGGGACCTGAACCCAGA
CAACAGCGATGTCGACAACTCTTATCCAACCTGGTTCAGACTTACAATCAGCTTTTCGAAGAGAACCCGATCAACGCATCCGGAGTTGACGCCAAAGCAATCCT
GAGCGCTAGGCTGTCCAAATCCCGGGCGCTCGAAAACCTCATCGCACAGCTCCCTGGGGAGAAGAAGAACGGCTGTTTGGTAATCTTATCGCCCTGCACTCG
GGCTGACCCCAACTTTAAATCTAATTCGACTGGCCGAAGATGCCAAGCTTCAACTGAGCAAAGACACCTACGATGATGATCTCGACAATCTGCTGGCCGACA
TCGGCCAGCAGTACGCAGACCTTTTTTGGCGGCAAGAAGCTGTAGACGCCATTCTGCTGAGTATTTCTGCGAGTGAACACGGAGATCAACAAAGCTCCG
CTGAGCGCTAGTATGATCAAGCGCTATGATGAGCACCACCAAGACTTGAACCTTGTCTGAAAGGCCCTTGTACAGACAGCAACTGCTGAGAAGTACAAGGAAATTTT
CTTCGATCAGTCTAAAAATGGCTACGCCGATACATTGACGGCGGAGCAAGCCAGGAGGAATTTACAAAATTTATAAGCCCATCTTGGAAAAAATGGACGGCA
CCGAGGAGCTGCTGGTAAAGCTTAAACAGAGAAGATCTGTTGCGCAAACAGCGCACTTTCGACAATGGAAGCATCCCCACCAGATTACCTGGGCGAACTGCA
CGTATCTCTCAGGCGGCAAGAGGATTTTACCCCTTTTTGAAAGATAACAGGGAAAAGATTGAGAAAAATCCTCACATTTTCGGATACCTACTATGTAGCCCTC
CGCCCGGGGAAATCCAGATTCGCTGGATGACTCGCAATCAGAAGAGCACCCTCCTGGAACCTCGAGGAAGTCTGGATAAGGGGGCTCTGCCAG
TCCTTCATCGAAAGGACTACTAACTTTGATAAAAACTGCTCAACGAAAAGGTGCTTCTCAACACTCTCTGCTGTACGAGTACTCACAGITTTATAACGAGCTCA
CCAAGTCAAATACGTCACAGAAGGGATGAGAAAAGCCAGCATTCTGTCTGGAGAGCAGAAGAAGCTATCGTGGACCTCCTTCAAGACGAACCGGAAAGT
TACCGTGAACAGCTCAAAGAAGACTATTTCAAAGATTGAATGTTTCGACTCTGTTGAAATCAGCGGAGTGGAGGATCGCTTCAACGCATCCCTGGGAACGT
ATCACGATCTCTGAAAATCATTAAAGACAAGGACTTCTGGACAATGAGGAGAACGAGGACATTCTTGAGGACATTGCTCCACCTTACGTTGTTTGAAGATA
GGGAGATGATTGAAGAAGCCTTGAACCTACGCTCATCTCTCGACGACAAAGTATGAACAGCTCAAGAGGCGCGGATACAGGATGGGGGCGGCTGTG
AAGAAAATGATCAATGGGATCCGAGACAAGCAGAGTGGAAAAGACAATCTGGATTTTCTAAGTCCGATGGATTGGCCAAACCGAACTTCAATGCAATGATCC
ATGATGACTCTCACCTTTAAGGAGGACATCCAGAAAAGCACAAGTTTCTGGCCAGGGGACAGTCTTACAGCAGATCGCTAATCTTGCAGGTAGCCAGCT
ATCAAAAAGGGAATACTGCAGACCGTTAAGGTCGTGGATGAACCTGTCAAAGTAAATGGGAAGGCATAAGCCGAGAATATCGTTATCGAGATGGCCGAGAG
AACCAAATACCCAGAAGGGACAGAAGAACAGTAGGGAAAGGATGAAGAGGATTGAAGAGGGTATAAAAAGAACTGGGGTCCCAAATCTTAAAGGAACACCC
AGTTGAAAACACCCAGCTTCAAGATGAGAAGCTACTCTGACTACCTGCAGAACGGCAGGGACATGTACGTGGATCAGGAAGTGGACATCAATCGGCTCTCCG
ACTACGACGTGGATCATATCGTCCCGAGTCTTTTCAAAGATGATTTGATAATAAAGTGTGACAAGATCCGATAAAAAATGAGGGGAAGAGTGATAAC
GTCCCTCAGAAGAAGTTGTCAAGAAAATGAAAAATTTGGCGGACAGTCTGCTGAACGGCAAACCTGATCACACAACGGAAGTTCGATAATCTGACTAAGGCTG
AACGAGGTGGCTGTCTGAGTTGGATAAAGCCGGCTTCAAAAAGGACGCTTGTGAGACACGCCAGATCACCAAGCACGTGGCCCAAATTTCTCGATTACGC
ATGAACACCAAGTACGATGAAAATGACAACTGATTCGAGAGGTGAAAAGTTACTCTGAAAGTCTAAGCTGGTCTCAGATTTCAAGAAAGGACTTTTCAATTTAT
AAGGTGAGAGAGATCAACAATACCACCATGCGCATGATGCCTACCTGAATGCAGTGGTAGGCACTGCATTTACAAAAATATCCAAAGCTTGAATCTGAATT
TGATTTTCAAGACCGAGATTACACTGGCCAATGGAGAGATTGCGAAGCGACCATTATCGAAAACAACGGAGAAACAGGAGAAATCGTGTGGGACAAGG
GTAGGGATTTCCGACAGTCCGGAAGTCTGTCCATGCCGAGGTGAACATCGTTAAAAGACCGAAGTACAGACCGGAGGCTTCTCCAAGGAAAGTATCCT
CCGAAAAGGAACAGCGACAAGCTGATCGACGCAAAAAAGATTGGGACCCCAAGAAATACGGCGGATTGATTTCTCTACAGTCTGTTACAGTACTGGTT
GTGGCCAAAGTGGAGAAAGGGAGTCAAAAACTCAAAGCGTCAAGGAAGTCTGGGCATCACAAATCATGGAGCGATCAAGCTTCCAAAAAACCCCATC
GACTTTCTCGAGGCGAAAGGATATAAAGAGGTCAAAAAAGACCTCATTAAGCTTCCAAAGTACTCTCTTTGAGCTTGAACCGCCGAAACGAATGCT
CGTACTGCGGGCGAGCTGCAGAAAGGTAACGAGCTGGCACTGCCCTCAATAACGTTAATTTCTTGTATCTGGCCAGCCACTATGAAAAGCTCAAAGGGTCTC
CCGAAAGATAATGAGCAGAAGCAGCTGTTCTGGAACAACAACAACACTACCTGATGAGATCATCGAGCAAATAAGCAATTTCCAAAAGAGTGATCTCGCC
GACGCTAACCTCGATAAGGTGCTTTCTGCTTACAATAAGCACAGGGATAAGCCCATCAGGGAGCAGGCAGAAAACATTATCCACTTGTACTCTGACCAACTG
GGCGCGCTGCAGCTTCAAGTACTTGCACACCACCATAGACAGAAAGCGGTACACCTTCAAAAAGGAGGTCTGTGAGCCACACTGATTCATCAGTCAATTAC
GGGCTCTATGAAACAAGAATCGACTCTCTCAGCTCGGTGGAGACAAAAGGCCGGCCACGAAAAAGGCCAGGCAAAAAAGAAAAAGGAGGGCA
GAGGAAGTCTTCAACATGCGGTGACGTGGAGGAGAATCCCGGCCAATGACCGAGTACAAGCCACGGTGCCTCGCCACCCGCGACGACTCCCAGGGC
CGTACGCACCCCTGCGCCGCGCTTCGCCGACTACCCCGCACGCGCCACCCGTCGATCCGAGCCGACATCGAGCGGGTCAACGAGCTGCAAGAAGCTCTCC
TCACGCGCGTGGGCTCGACATCGGCAAGGTGTGGTTCGCGGACGACGGCCGCGGCTGGCGGTCTGGACCAGCCGAGAGCGTCAAGACGGGGGGCGGTG
TTCCGCGAGATCGGCCCGCATGGCCGAGTTGAGCGGTTCCCGGCTGGCCGCGCAGCAACAGATGGAAGGCTCTGGCGCCGACCCGCCAAAGGAGCCC
GCGTGGTTCTGGCCACCGTCCGGCTCTGCCCGACCAAGGGCAAGGGTCTGGGACGCGCCGCTGCTGCTCCCGGAGTGGAGGCGGGCAGCGCGCCGGG
GTGCCGCTTCTGGAGACCTCCGCGCCCGCAACTCCCTTCTACGACGGCTCGGCTTCAACGTCACCGCTCAGGCGCGGCTGAGTCCCGAAGGACCCGCGCAG
CTGGTGCATGACCCGCAAGCCGGTGCCTGAGCTCGTTTCTGCTGCTCAATTTCTATTAAGGTTCTTGTCCCTAAGTCAACTACTAACTGGGGGATAT
TATGAAGGCCCTGAGCATCTGGATTCTGCTGCTAAAAAACATTGATTGTTCAATGCGC
    
```

Nucleo-  
plasmin  
NLS

2A-peptide

Puromycin-

3'UTR Human beta globin

**CIDEA-ORF mRNA template (GenBank accession number: MG694579)**

T7 Promoter

5'UTR AP2

CIDEA codon optimized ORF

5'TTGGACCCTCGTACAGAAGCTAATACGACTCACTATAGGGTCACAGCACCTCTGAAAACCTGCAGCTTCCTTCTCACCTTGAAGAATAATCCTAGAAAACCTCAAAAATG GAG GCC GCT AGG GAC TAT GCC GGC GCT CTG ATC AGG CCC CTG ACC TTC ATG GGG AGC CAA ACA AAG CGG GTG CTG TTT ACC CCC CTG ATG CAC CCC GCC AGG CCC TTC AGG GTG TCA AAC CAT GAT CGC TCA AGC AGA CGC GGC GTC ATG GCC AGC TCC TTG CAG GAG CTC ATT TCC AAA ACG CTG GAT GCG CTG GTC ATA GCA ACA GGT CTG GTG ACC CTC GTG CTC GAG GAG GAT GGC ACA GTC GTC GAC ACG GAA GAG TTT TTC CAG ACG TTG GGA GAT AAT ACC CAT TTC ATG ATT CTG GAG AAG GGC CAG AAA TGG ATG CCC GGC TCT CAG CAT GTA CCT ACC TGC TCC CCT CCA AAG CGC TCA GGC ATT GCT AGG GTT ACG TTC GAC TTG TAT CGG CTG AAT CCG AAG GAT TTC ATC GGC TGC TTG AAT GTT AAG GCC ACT ATG TAT GAA ATG TAC AGC GTT TCA TAC GAT ATC CGG TGC ACT GGA CTC AAG GGG CTC CTG AGA TCC CTG CTT CGG TTT TTG TCA TAT TCC GCA CAA GTG ACC GGC CAG TTC CTG ATT TAT CTG GGC ACC TAT ATG CTG CGC GTG CTC GAC GAT AAA GAG GAG AGA CCC TCC CTG AGATCCAAGCAAAGGCAGGTTACCTGCGGCTGAGCTCGCTTTCTTGCTGTCCAATTTCTATTAAGGTTCTTTGTTCCCTAAGTCCAACACTACTAAACTGGGGATATTATGAAGGGCCTTGAGCATCTGGATTCTGCCTGCTAAAAAACATTGTATTGTTTCATTGCGC

3'UTR HBB

**CIDEA-3XHA-ORF mRNA template (GenBank accession number: MG694580)**

5'TTGGACCCTCGTACAGAAGCTAATACGACTCACTATAGGGTCACAGCACCTCTGAAAACCTGCAGCTTCCTTCTCACCTTGAAGAATAATCCTAGAAAACCTCAAAAATG GAG GCC GCT AGG GAC TAT GCC GGC GCT CTG ATC AGG CCC CTG ACC TTC ATG GGG AGC CAA ACA AAG CGG GTG CTG TTT ACC CCC CTG ATG CAC CCC GCC AGG CCC TTC AGG GTG TCA AAC CAT GAT CGC TCA AGC AGA CGC GGC GTC ATG GCC AGC TCC TTG CAG GAG CTC ATT TCC AAA ACG CTG GAT GCG CTG GTC ATA GCA ACA GGT CTG GTG ACC CTC GTG CTC GAG GAG GAT GGC ACA GTC GTC GAC ACG GAA GAG TTT TTC CAG ACG TTG GGA GAT AAT ACC CAT TTC ATG ATT CTG GAG AAG GGC CAG AAA TGG ATG CCC GGC TCT CAG CAT GTA CCT ACC TGC TCC CCT CCA AAG CGC TCA GGC ATT GCT AGG GTT ACG TTC GAC TTG TAT CGG CTG AAT CCG AAG GAT TTC ATC GGC TGC TTG AAT GTT AAG GCC ACT ATG TAT GAA ATG TAC AGC GTT TCA TAC GAT ATC CGG TGC ACT GGA CTC AAG GGG CTC CTG AGA TCC CTG CTT CGG TTT TTG TCA TAT TCC GCA CAA GTG ACC GGC CAG TTC CTG ATT TAT CTG GGC ACC TAT ATG CTG CGC GTG CTC GAC GAT AAA GAG GAG AGA CCC TCC CTG AGATCCAAGCAAAGGCAGGTTACCTGCGGCTACCCATACGATGTTCTGACTATGCGGGCTATCCCTATGACGTCCCGGACTATGCAGGATCCTATCCATATGACGTTCCAGATTACGCTGAGCTCGCTTTCTTGCTGTCCAATTTCTATTAAGGTTCTTTGTTCCCTAAGTCCAACACTACTAAACTGGGGATATTATGAAGGGCCTTGAGCATCTGGATTCTGCCTGCTAAAAAACATTGTATTGTTTCATTGCGC

**CIDEA-5XHis-ORF mRNA template (GenBank accession number: MG694581):**

5'TTGGACCCTCGTACAGAAGCTAATACGACTCACTATAGGGTCACAGCACCTCTGAAAACCTGCAGCTTCCTTCTCACCTTGAAGAATAATCCTAGAAAACCTCAAAAATG GAG GCC GCT AGG GAC TAT GCC GGC GCT CTG ATC AGG CCC CTG ACC TTC ATG GGG AGC CAA ACA AAG CGG GTG CTG TTT ACC CCC CTG ATG CAC CCC GCC AGG CCC TTC AGG GTG TCA AAC CAT GAT CGC TCA AGC AGA CGC GGC GTC ATG GCC AGC TCC TTG CAG GAG CTC ATT TCC AAA ACG CTG GAT GCG CTG GTC ATA GCA ACA GGT CTG GTG ACC CTC GTG CTC GAG GAG GAT GGC ACA GTC GTC GAC ACG GAA GAG TTT TTC CAG ACG TTG GGA GAT AAT ACC CAT TTC ATG ATT CTG GAG AAG GGC CAG AAA TGG ATG CCC GGC TCT CAG CAT GTA CCT ACC TGC TCC CCT CCA AAG CGC TCA GGC ATT GCT AGG GTT ACG TTC GAC TTG TAT CGG CTG AAT CCG AAG GAT TTC ATC GGC TGC TTG AAT GTT AAG GCC ACT ATG TAT GAA ATG TAC AGC GTT TCA TAC GAT ATC CGG TGC ACT GGA CTC AAG GGG CTC CTG AGA TCC CTG CTT CGG TTT TTG TCA TAT TCC GCA CAA GTG ACC GGC CAG TTC CTG ATT TAT CTG GGC ACC TAT ATG CTG CGC GTG CTC GAC GAT AAA GAG GAG AGA CCC TCC CTG AGATCCAAGCAAAGGCAGGTTACCTGCGGCTAGTGGTGGTGGTAGTGTGAGCTCGCTTTCTTGCTGTCCAATTTCTATTAAGGTTCTTTGTTCCCTAAGTCCAACACTACTAAACTGGGGATATTATGAAGGGCCTTGAGCATCTGGATTCTGCCTGCTAAAAAACATTGTATTGTTTCATTGCGC

**CIDEA(K23A)-3XHA-ORF mRNA template (GenBank accession number: MG694582):**

5'TTGGACCCTCGTACAGAAGCTAATACGACTCACTATAGGGTCACAGCACCTCTGAAAACCTGCAGCTTCCTTCTCACCTTGAAGAATAATCCTAGAAAACCTCAAAAATG GAG GCC GCT AGG GAC TAT GCC GGC GCT CTG ATC AGG CCC CTG ACC TTC ATG GGG AGC CAA ACA GCG CGG GTG CTG TTT ACC CCC CTG ATG CAC CCC GCC AGG CCC TTC AGG GTG TCA AAC CAT GAT CGC TCA AGC AGA CGC GGC GTC ATG GCC AGC TCC TTG CAG GAG CTC ATT TCC AAA ACG CTG GAT GCG CTG GTC ATA GCA ACA GGT CTG GTG ACC CTC GTG CTC GAG GAG GAT GGC ACA GTC GTC GAC ACG GAA GAG TTT TTC CAG ACG TTG GGA GAT AAT ACC CAT TTC ATG ATT CTG GAG AAG GGC CAG AAA TGG ATG CCC GGC TCT CAG CAT GTA CCT ACC TGC TCC CCT CCA AAG CGC TCA GGC ATT GCT AGG GTT ACG TTC GAC TTG TAT CGG CTG AAT CCG AAG GAT TTC ATC GGC TGC TTG AAT GTT AAG GCC ACT ATG TAT GAA ATG TAC AGC GTT TCA TAC GAT ATC CGG TGC ACT GGA CTC AAG GGG CTC CTG AGA TCC CTG CTT CGG TTT TTG TCA TAT TCC GCA CAA GTG ACC GGC CAG TTC CTG ATT TAT CTG GGC ACC TAT ATG CTG CGC GTG CTC GAC GAT AAA GAG GAG AGA CCC TCC CTG AGATCCAAGCAAAGGCAGGTTACCTGCGGCTACCCATACGATGTTCTGACTATGCGGGCTATCCCTATGACGTCCCGGACTATGCAGGATCCTATCCATATGACGTTCCAGATTACGCTGAGCTCGCTTTCTTGCTGTCCAATTTCTATTAAGGTTCTTTGTTCCCTAAGTCCAACACTACTAAACTGGGGATATTATGAAGGGCCTTGAGCATCTGGATTCTGCCTGCTAAAAAACATTGTATTGTTTCATTGCGC

**CIDEA(R44A)-3XHA -ORF mRNA template (GenBank accession number: MG694583):**

5'TTGGACCCTCGTACAGAAGCTAATACGACTCACTATAGGGTCACAGCACCTCTGAAAAGTGCAGCTTCCTTCTCACCTTGAAGAATAATCCTAGAAAAGTCA  
ACAAAATG GAG GCC GCT AGG GAC TAT GCC GGC GCT CTG ATC AGG CCC CTG ACC TTC ATG GGG AGC CAA ACA AAG CGG GTG CTG TTT ACC CCC  
CTG ATG CAC CCC GCC AGG CCC TTC AGG GTG TCA AAC CAT GAT GCC TCA AGC AGA CGC GGC GTC ATG GCC AGC TCC TTG CAG GAG CTC ATT  
TCC AAA ACG CTG GAT GCG CTG GTC ATA GCA ACA GGT CTG GTG ACC CTC GTG CTC GAG GAG GAT GGC ACA GTC GTC GAC ACG GAA GAG TTT  
TTC CAG ACG TTG GGA GAT AAT ACC CAT TTC ATG ATT CTG GAG AAG GGC CAG AAA TGG ATG CCC GGC TCT CAG CAT GTA CCT ACC TGC TCC  
CCT CCA AAG CGC TCA GGC ATT GCT AGG GTT ACG TTC GAC TTG TAT CGG CTG AAT CCG AAG GAT TTC ATC GGC TGC TTG AAT GTT AAG GCC  
ACT ATG TAT GAA ATG TAC AGC GTT TCA TAC GAT ATC CGG TGC ACT GGA CTC AAG GGG CTC CTG AGA TCC CTG CTT CGG TTT TTG TCA TAT TCC  
GCA CAA GTG ACC GGC CAG TTC CTG ATT TAT CTG GGC ACC TAT ATG CTG CGC GTG CTC GAC GAT AAA GAG GAG AGA CCC TCC CTG  
AGATCCAAGCAAAAGGCAGGTTACCTGCGGCTACCCATACGATGTTCTGACTATGCGGGCTATCCCTATGACGTCCCAGGACTATGCAGGATCCTATCCAT  
ATGACGTTCCAGATTACGCTTGAGCTCGCTTTCTTGCTGTCCAATTTCTATTAAAGGTTCTTTGTTCCCTAAGTCCAACACTAAACTGGGGGATATTATGAAG  
GGCCTTGAGCATCTGGATTCTGCCTGCTAAAAACATTGTATTGTTATTGCGC
