# Supplementary material for: CIDEA Transcriptionally Regulates UCP1 for Britening and Thermogenesis in Human Fat Cells
Source: PubMed Central journal article supplement — iScience. 2019 Sep 13;20:73–89. doi: 10.1016/j.isci.2019.09.011 (PMC6817690; doi:10.1016/j.isci.2019.09.011), 2019-09-13
Supplement: mmc3.pdf [file mmc3.pdf]

**Data S2, Related to Figures 1-6 and S1-S12: Genes, Primer ID and sequences.** Following is a list of all the genes, their primer IDs, primer sequences and purpose.

| Primer ID | Gene                                       | Forward Primer Sequence 5'-3'                                                          | Purpose                                                                                                                                                                             |
|-----------|--------------------------------------------|----------------------------------------------------------------------------------------|-------------------------------------------------------------------------------------------------------------------------------------------------------------------------------------|
| VP-99     | sgCIDEA2 (AS2) <sub>FP</sub>               | GAAATTAATACGACTCACTATAGGGAGTCACCTT<br>CGACTTGTACGTTTAGAGCTAGAAATAGC                    | Forward primer to generate AS2 sgRNA template by annealing, extension followed by PCR amplification. Forward primer contains T7 promoter ;yellow region overlaps with the scaffold. |
| VP-100    | SgRNA <sub>scaffold</sub> RP               | AAAAGCACCGACTCGGTGCCACTTTTTCAAGTTG<br>ATAACGGACTAGCCTTATTTAACTTGCTATTCT<br>AGCTCTAAAAC | Reverse primer to generate AS2 sgRNA template by annealing, extension followed by PCR amplification. Forward primer contains T7 promoter ;yellow region overlaps with the scaffold. |
| VP-101    | sgCIDEA1 (AS1) <sub>FP</sub>               | GAAATTAATACGACTCACTATAGGNTGAACGAG<br>CGGCGGCTTCTCGTTTAGAGCTAGAAATAGC                   | Forward primer to generate S1 sgRNA template by annealing, extension followed by PCR amplification. Forward primer contains T7 promoter; yellow region overlaps with the scaffold.  |
| VP-102    | Cas9 <sub>FP</sub>                         | ATGGACAAGAAGTACAGCATCGGCCTGGAC                                                         | Forward primer used to amplify Cas9 from Pcw-Cas9                                                                                                                                   |
| VP-103    | Cas9 <sub>RP</sub>                         | GTCGCCTCCAGCTGAGACAGGTGCG                                                              | Reverse primer used to amplify Cas9 from Pcw-Cas9                                                                                                                                   |
| VP-104    | Puromycin <sub>FP</sub>                    | ATGACCGAGTACAAGCCACGGTGCGCC                                                            | Forward primer used to amplify Puromycin from Pcw-Cas9                                                                                                                              |
| VP-105    | Puromycin <sub>RP</sub>                    | TCAGGCACCGGCTTGC GGGTCA                                                                | Reverse primer used to amplify Puromycin from Pcw-Cas9                                                                                                                              |
| VP-106    | Cas9D10A <sub>mut</sub> <sub>FP</sub>      | ATAGGCTTAGcTATCGGCACAAATAGCGTCGG                                                       | Forward primer used to mutate Cas9                                                                                                                                                  |
| VP-107    | Cas9D10A <sub>mut</sub> <sub>RP</sub>      | TGTGCCGATAgCTAAGCCTATTGAGTATTTTC                                                       | Reverse primer used to mutate Cas9                                                                                                                                                  |
| VP-108    | Cas9H840A <sub>mut</sub> <sub>FP</sub>     | GATGTCGATgCATTGTCCACAAAGTTTCC                                                          | Forward primer used to mutate Cas9                                                                                                                                                  |
| VP-109    | Cas9H840A <sub>mut</sub> <sub>RP</sub>     | GGAACAATGgcATCGACATCATAATCACTT                                                         | Reverse primer used to mutate Cas9                                                                                                                                                  |
| VP-110    | T7p -5'UTRHBB <sub>FP</sub>                | TTGGACCCTCGTACAGAAGCTAATACGACTCACT<br>ATAGGGACATTGCTTCTGACA                            | Forward primer to generate T7 promoter-5'UTR HBB fragment by annealing and extension by Taq polymerase                                                                              |
| VP-112    | T7p -5'UTRHBB <sub>RP</sub>                | GGTGTCTGTTTGTAGTTGCTAGTGAACACAGTT<br>GTGTCAGAAGCAAATGTCCC                              | Reverse primer to generate T7 promoter-5'UTR HBB fragment by annealing and extension by Taq polymerase                                                                              |
| VP-113    | NLS-T2A <sub>FP</sub>                      | AAAAGGCCGGCCGACGAAAAAGGCCGGCCA<br>GGCAAAAAAGAAAAAGGAGGGCAGAGGAAGT<br>CT                | Forward primer to generate Nucleoplasmin-NLS-T2A fragment by annealing and extension by Taq polymerase                                                                              |
| VP-114    | NLS-T2A <sub>RP</sub>                      | TGGGCCGGGATTCTCCTCCAGCTCACCGCATGTT<br>AGAAGACTTCTCTGCCCTC                              | Reverse primer to generate Nucleoplasmin-NLS-T2A fragment by annealing and extension of primers by Taq Polymerase                                                                   |
| VP-115    | T7p -5'UTR <sub>gibson</sub> <sub>FP</sub> | TTGGACCCTCGTACAGAAG                                                                    | Forward primer to amplify T7 p- 5'UTR for Gibson assembly of all the mRNA template                                                                                                  |

|        |                                            |                                                                                    |                                                                                                                                               |
|--------|--------------------------------------------|------------------------------------------------------------------------------------|-----------------------------------------------------------------------------------------------------------------------------------------------|
| VP-116 | T7p -5'UTR-HBB_gibson <sub>RP</sub>        | tcttgccatGGTGTCTGTTGAGGTTG                                                         | Reverse primer to amplify T7 p- 5'UTR_HBB for Gibson assembly of Cas9D10A-2A-Puro hybrid mRNA template (lowercase overlaps with Cas9D10A)     |
| VP-117 | hspCAS9D10A_gibson <sub>n FP</sub>         | aacagacaccATGGACAAGAAGTACTCCATTGG                                                  | Forward primer to amplify hspCAS9D10A for Gibson assembly of Cas9D10A-2A-Puro hybrid mRNA template (lowercase overlaps with T7 p- 5'UTR_HBB)  |
| VP-118 | hspCAS9D10A_gibson <sub>n RP</sub>         | cggccttttGTCTCCACCGAGCTGAGAG                                                       | Reverse primer to amplify hspCAS9D10A for Gibson assembly of Cas9D10A-2A-Puro hybrid mRNA template (lowercase overlaps with NLS-T2A fragment) |
| VP-119 | NLS-T2A_gibson <sub>FP</sub>               | cggtggagacAAAAGGCCGCGGCCACG                                                        | Forward primer to amplify NLS-T2A for Gibson assembly of Cas9D10A-2A-Puro hybrid mRNA template (lowercase overlaps with hspCAS9D10A)          |
| VP-120 | NLS-T2A_gibson <sub>RP</sub>               | actcgtcatTGGGCCGGGATTCTCCTCC                                                       | Reverse primer to amplify NLS-T2A for Gibson assembly of Cas9D10A-2A-Puro hybrid mRNA template (lowercase overlaps with Puromycin-R)          |
| VP-121 | Puromycin-R_gibson <sub>FP</sub>           | tcccggcccaATGACCGAGTACAAGCCACGG                                                    | Forward primer to amplify Puromycin-R for Gibson assembly of Cas9D10A-2A-Puro hybrid mRNA template (lowercase overlaps with NLS-T2A)          |
| VP-122 | Puromycin-R_gibson <sub>RP</sub>           | gaaagcagcTCAGGCACCGGGCTTGCG                                                        | Reverse primer to amplify Puromycin-R for Gibson assembly of Cas9D10A-2A-Puro hybrid mRNA template (lowercase overlaps with 3'UTR-HBB)        |
| VP-123 | 3'UTR-HBB_gibson <sub>FP</sub>             | cggtgcctgaGCTCGTTTCTTGCTGTC                                                        | Forward primer to amplify 5'UTR_HBB for Gibson assembly of Cas9D10A-2A-Puro hybrid mRNA template (lowercase overlaps with Puromycin-R)        |
| VP-124 | 3'UTR-HBB_gibson <sub>RP</sub>             | GCGCAATGAACAATACAATG                                                               | Reverse primer to amplify 5'UTR_HBB for Gibson assembly of all the mRNA template                                                              |
| VP-125 | All in one FP                              | TTGGACCCTCGTACAGAAGCTAATACGA                                                       | Forward primer to amplify all the mRNA template after Gibson assembly                                                                         |
| VP-126 | All in one RP                              | TTTTTTTTTTTTTTTTTTTTCGCAATGAACAATACAATG                                            | Reverse primer to amplify all the mRNA template after Gibson assembly                                                                         |
| VP-127 | T7p -5'UTR AP2 <sub>FP</sub>               | TTGGACCCTCGTACAGAAGCT <b>TAATACGACTCAC</b><br><b>TATAGGGTCACAGCACCCCTCTGAAACTG</b> | Forward primer to generate T7 promoter-5'UTR AP2 fragment by annealing and extension by Taq polymerase                                        |
| VP-128 | T7p -5'UTR AP2 <sub>RP</sub>               | TTGTGAGTTTTCTAGGATTATTCTCAAGGTGA<br>GAAGGAAGCTGCAGTTTTCAGGAGGGTGCTGT<br>GACCC      | Reverse primer to generate T7 promoter-5'UTR AP2 fragment by annealing and extension by Taq polymerase                                        |
| VP-129 | T7p-5'UTR-AP2_gibson_CIDEA <sub>A RP</sub> | cggcctccatTTTGTGAGTTTTCTAGGATTATTCTTC                                              | Reverse primer to amplify T7 p- 5'UTR-AP2 for Gibson assembly of CIDEA mod mRNA template (lowercase overlaps with CIDEA-ORF)                  |
| VP-130 | CIDEA-ORF_gibson <sub>FP</sub>             | aactcacaaaATGGAGGCCGCTAGGGAC                                                       | Forward primer to amplify CIDEA-ORF for Gibson assembly of CIDEA mod mRNA template (lowercase overlaps with T7 p- 5'UTR-AP2)                  |

|        |                                         |                                       |                                                                                                                                         |
|--------|-----------------------------------------|---------------------------------------|-----------------------------------------------------------------------------------------------------------------------------------------|
| VP-131 | CIDEA-ORF_gibson<br>RP                  | gaaagcgagcTCAGCCGCAGGTGAACCTG         | Reverse primer to amplify CIDEA-ORF for Gibson assembly of CIDEA mod mRNA template (lowercase overlaps with 3'UTR-HBB)                  |
| VP-132 | 3'UTR-HBB_gibson_CIDEA<br>FP            | ctgcgctgaGCTCGCTTCTTGCTGTC            | Forward primer to amplify 3'UTR-HBB for Gibson assembly of CIDEA mod mRNA template (lowercase overlaps with CIDEA-ORF)                  |
| VP-133 | T7p-5'UTR-AP2_gibson_LXR $\alpha$<br>RP | acaaggacatTTTGTGAGTTTTCTAGGATTATTCTTC | Reverse primer to amplify T7 p- 5'UTR-AP2 for Gibson assembly of LXR $\alpha$ mRNA template (lowercase overlaps with LXR $\alpha$ -ORF) |
| VP-134 | LXR $\alpha$ -ORF_gibson<br>FP          | aactcacaaaATGTCCTTGTGGCTGGGG          | Forward primer to amplify LXR $\alpha$ -ORF for Gibson assembly of LXR $\alpha$ mRNA template (lowercase overlaps with T7 p- 5'UTR-AP2) |
| VP-135 | LXR $\alpha$ -ORF_gibson<br>RP          | gaaagcgagcTCATTGTGCACATCCCAG          | Reverse primer to amplify LXR $\alpha$ -ORF for Gibson assembly of LXR $\alpha$ mRNA template (lowercase overlaps with 3'UTR-HBB)       |
| VP-136 | 3'UTR-HBB_gibson_LXR $\alpha$<br>FP     | gcacgaatgaGCTCGCTTCTTGCTGTC           | Forward primer to amplify 3'UTR-HBB for Gibson assembly of LXR $\alpha$ mRNA template (lowercase overlaps with LXR $\alpha$ -ORF)       |
| VP-137 | T7p-5'UTR-AP2_gibson_LXR $\beta$<br>RP  | gagaggacatTTTGTGAGTTTTCTAGGATTATTCTTC | Reverse primer to amplify T7 p- 5'UTR-AP2 for Gibson assembly of LXR $\beta$ mRNA template (lowercase overlaps with LXR $\beta$ -ORF)   |
| VP-138 | LXR $\beta$ -ORF_gibson<br>FP           | aactcacaaaATGTCCTCTCTACCACGAG         | Forward primer to amplify LXR $\beta$ -ORF for Gibson assembly of LXR $\beta$ mRNA template (lowercase overlaps with T7 p- 5'UTR-AP2)   |
| VP-139 | LXR $\beta$ -ORF_gibson<br>RP           | gaaagcgagcTCACTCGTGACGTCCCAG          | Reverse primer to amplify LXR $\beta$ -ORF for Gibson assembly of LXR $\beta$ mRNA template (lowercase overlaps with 3'UTR-HBB)         |
| VP-140 | 3'UTR-HBB_gibson_LXR $\beta$<br>FP      | ccacgagtgaGCTCGCTTCTTGCTGTC           | Forward primer to amplify 3'UTR-HBB for Gibson assembly of LXR $\beta$ mRNA template (lowercase overlaps with LXR $\beta$ -ORF)         |
| VP-141 | T7p-5'UTR-AP2_gibson_RXR $\alpha$<br>RP | tggtgtccatTTTGTGAGTTTTCTAGGATTATTCTTC | Reverse primer to amplify T7 p- 5'UTR-AP2 for Gibson assembly of RXR $\alpha$ mRNA template (lowercase overlaps with RXR $\alpha$ -ORF) |
| VP-142 | RXR $\alpha$ -ORF_gibson<br>FP          | aactcacaaaATGGACACCAACATTTTC          | Forward primer to amplify RXR $\alpha$ -ORF for Gibson assembly of RXR $\alpha$ mRNA template (lowercase overlaps with T7 p- 5'UTR-AP2) |
| VP-143 | RXR $\alpha$ -ORF_gibson<br>RP          | gaaagcgagcCTAAGTCATTTGGTGCGG          | Reverse primer to amplify RXR $\alpha$ -ORF for Gibson assembly of RXR $\alpha$ mRNA template (lowercase overlaps with 3'UTR-HBB)       |
| VP-144 | 3'UTR-HBB_gibson_RXR $\alpha$<br>FP     | aatgacttagGCTCGCTTCTTGCTGTC           | Forward primer to amplify 3'UTR-HBB for Gibson assembly of RXR $\alpha$ mRNA template (lowercase overlaps with RXR $\alpha$ -ORF)       |

|                                      |                                      |                                                                       |                                                                                                                                                                                                   |
|--------------------------------------|--------------------------------------|-----------------------------------------------------------------------|---------------------------------------------------------------------------------------------------------------------------------------------------------------------------------------------------|
| VP-145                               | 3XHA <sub>FP</sub>                   | TACCCATACGATGTTCTGACTATGCGGGCTATC<br>CCTATGACGTCCCGGACTATGC           | Forward primer to generate 3X-HA fragment by annealing and extension by Taq polymerase                                                                                                            |
| VP-146                               | 3XHA <sub>RP</sub>                   | TCAAGCGTAATCTGGAACGTCATATGGATAGGA<br>TCCTGCATAGTCCGGGACGTCATAG        | Reverse primer to generate 3X-HA fragment by annealing and extension by Taq polymerase                                                                                                            |
| VP-147                               | CIDEA 3XHA-ORF <sub>gibson FP</sub>  | aactcacaaaATGGAGGCCGCTAGGGAC                                          | Forward primer to amplify CIDEA-ORF for Gibson assembly of CIDEA-3XHA mod mRNA template (lowercase overlaps with T7 p- 5'UTR-AP2)                                                                 |
| VP-148                               | CIDEA 3XHA-ORF <sub>gibson RP</sub>  | cgtagggtaGCCGCAGGTGAACCTGCC                                           | Reverse primer to amplify CIDEA-ORF for Gibson assembly of CIDEA-3XHA mod mRNA template (lowercase overlaps with 3XHA)                                                                            |
| VP-149                               | 3XHA <sub>gibson FP</sub>            | cacctgcggcTACCCATACGATGTTCTCTG                                        | Forward primer to amplify 3XHA for Gibson assembly of CIDEA-3XHA mod mRNA template (lowercase overlaps with CIDEA ORF)                                                                            |
| VP-150                               | 3XHA <sub>gibson RP</sub>            | gaaagcgagcTCAAGCGTAATCTGGAAC                                          | Reverse primer to amplify 3XHA for Gibson assembly of CIDEA-3XHA mod mRNA template (lowercase overlaps with 3'UTR HBB)                                                                            |
| VP-151                               | 3'UTR-HBB <sub>gibson 3XHA FP</sub>  | ttacgcttgaGCTCGCTTTCTTGCTGTC                                          | Forward primer to amplify 3'UTR-HBB for Gibson assembly of CIDEA-3XHA mod mRNA template (lowercase overlaps with 3XHA)                                                                            |
| VP-152                               | 6XHis-3'UTR HBB <sub>FP</sub>        | GTAGTGGTGGTGGTAGTGTGAGCTCGCTTTCTT<br>GCTGTCCAATTTCTATTAAGGTTCC        | Forward primer to append and amplify 6XHis containing 3'UTR-HBB.                                                                                                                                  |
| VP-153                               | CIDEA 6XHis-ORF <sub>gibson RP</sub> | ctaccaccaccactacGCCGCAGGTGAACCTGCC                                    | Reverse primer to amplify CIDEA-ORF for Gibson assembly of CIDEA-6XHis mod mRNA template (lowercase overlaps with 6XHis)                                                                          |
| VP-154                               | 6XHis'3'UTR <sub>gibson FP</sub>     | cacctgcggcGTAGTGGTGGTGGTAGTG                                          | Forward primer to amplify 6XHis for Gibson assembly of CIDEA-3XHA mod mRNA template (lowercase overlaps with CIDEA ORF)                                                                           |
| VP-155                               | (A) CIDEA K23A mut <sub>RP</sub>     | A) ACCTTCATGGGG AGCCAA<br>ACA <b>G</b> CGGGGTGCTG TTTACC              | All in one FP , CIDEA K23A mut <sub>RP</sub> and All in one RP , CIDEA K23A mut <sub>FP</sub> were utilized for nested PCR from CIDEA-3XHA mod mRNA template to create K23A mutation at CIDEA ORF |
| VP-157                               | (B) CIDEA K23A mut <sub>FP</sub>     | B) GGTAAACAGCACCC <b>GC</b> GCTTTGGCTCCCAT<br>GAAGGT                  |                                                                                                                                                                                                   |
| VP-158                               | (A) CIDEA R44A mut <sub>RP</sub>     | A) TCA AAC CAT GAT <b>GCC</b> TCA AGC AGA CGC<br>GGC GTC ATG GCC AGC. | All in one FP , CIDEA R44A mut <sub>RP</sub> and All in one RP , CIDEA R44A mut <sub>FP</sub> were utilized for nested PCR from CIDEA-3XHA mod mRNA template to create R44A mutation at CIDEA ORF |
| VP-159                               | (B) CIDEA R44A mut <sub>FP</sub>     | B) GCTGGCCATGACGCCGCTGCTTGAG <b>GC</b> ATC<br>ATGGTTGA                |                                                                                                                                                                                                   |
| VP-160<br>(CIDEA <sub>1-70aa</sub> ) | All in one FP                        | TTGGACCCTCGTACAGAAGCTAATACGA                                          | Forward primer to amplify T7p-5'UTR-AP2 and forward primer to amplify all the mRNA template after Gibson assembly                                                                                 |

|                                                        |                                                                        |                                                 |                                                                                                                                                                                                            |
|--------------------------------------------------------|------------------------------------------------------------------------|-------------------------------------------------|------------------------------------------------------------------------------------------------------------------------------------------------------------------------------------------------------------|
| VP-161<br>(CIDEA <sub>1-70aa</sub> )                   | T7p-5'UTR-<br>AP2_gibson_CIDE<br>A <sub>RP</sub>                       | cggcctccatTTTGTGAGTTTCTAGGATTATTCCTC            | Reverse primer to amplify T7 p- 5'UTR-AP2 for Gibson assembly of CIDEA mod mRNA template (lowercase overlaps with CIDEA <sub>1-70aa</sub> )                                                                |
| VP-162<br>(CIDEA <sub>1-70aa</sub> )                   | CIDEA <sub>1-70aa</sub><br>3XHA_gibson <sub>FP</sub>                   | aactcacaaaATGGAGGCCGCTAGGGAC                    | Forward primer to amplify CIDEA <sub>1-70aa</sub> for Gibson assembly of CIDEA <sub>1-70aa</sub> mRNA template (lowercase overlaps with T7 p-5'UTR-AP2)                                                    |
| VP-163<br>(CIDEA <sub>1-70aa</sub> )                   | CIDEA <sub>1-70aa</sub><br>3XHA_gibson <sub>RP</sub>                   | cgtatgggtaTGTTGCTATGACCAGCGC                    | Reverse primer to amplify CIDEA <sub>1-70aa</sub> for Gibson assembly of CIDEA <sub>1-70aa</sub> mod mRNA template (lowercase overlaps with 3XHA-3'UTR fragment)                                           |
| VP-164<br>(CIDEA <sub>1-70aa</sub> )                   | 3X-HA-<br>3'UTR_gibson <sub>FP</sub>                                   | catagcaacaTACCCATACGATGTTCTCTG                  | Forward primer to amplify 3XHA-3'UTR for Gibson assembly of CIDEA <sub>1-70aa</sub> mod mRNA template (lowercase overlaps with CIDEA <sub>1-70aa</sub> fragment)                                           |
| VP-165<br>CIDEA <sub>1-70aa</sub>                      | All in one RP                                                          | TTTTTTTTTTTTTTTTTTTTCGCAATGAACAATAC<br>AATG     | Reverse primer to amplify 3XHA-3'UTR and Reverse primer to amplify all the mRNA template after Gibson assembly                                                                                             |
| VP-166<br>(CIDEA <sub>1-160aa</sub> )                  | CIDEA <sub>1-160aa</sub><br>3XHA_gibson <sub>RP</sub>                  | cgtatgggtaATCGTATGAAACGCTGTACATTTTCAT<br>ACATAG | Reverse primer to amplify CIDEA <sub>1-160aa</sub> for Gibson assembly of CIDEA <sub>1-160aa</sub> mod mRNA template (lowercase overlaps with 3XHA-3'UTR fragment)                                         |
| VP-167<br>(CIDEA <sub>1-160aa</sub> )                  | 3X-HA-<br>3'UTR_gibson <sub>FP</sub>                                   | ttcatacgatTACCCATACGATGTTCTCTG                  | Forward primer to amplify 3XHA-3'UTR for Gibson assembly of CIDEA <sub>1-160aa</sub> mod mRNA template (lowercase overlaps with CIDEA <sub>1-160aa</sub> fragment)                                         |
| VP-168<br>CIDEA <sub>(12-19Δ[55-63]Δ[166-175]aa)</sub> | CIDEA <sub>(1-219Δ[55-63]Δ[166-175]aa)</sub> 3XHA_gibson <sub>RP</sub> | cgtatgggtaGCCGCAGGTGAACCTGCC                    | Reverse primer to amplify CIDEA <sub>(1-219Δ[55-63]Δ[166-175]aa)</sub> for Gibson assembly of CIDEA <sub>(1-219Δ[55-63]Δ[166-175]aa)</sub> mod mRNA template (lowercase overlaps with 3XHA-3'UTR fragment) |
| VP-169<br>CIDEA <sub>(1-219Δ[55-63]Δ[166-175]aa)</sub> | 3X-HA-<br>3'UTR_gibson <sub>FP</sub>                                   | cacctcgggcTACCCATACGATGTTCTCTG                  | Forward primer to amplify 3XHA-3'UTR for Gibson assembly of CIDEA <sub>(1-219Δ[55-63]Δ[166-175]aa)</sub> mod mRNA template (lowercase overlaps with CIDEA <sub>(1-219Δ[55-63]Δ[166-175]aa)</sub> fragment) |
| VP-170<br>(CIDEA <sub>126-184aa</sub> )                | T7p-5'UTR-<br>AP2_gibson_CIDE<br>A <sub>RP</sub>                       | tagcaatcatTTTGTGAGTTTCTAGGATTATTCCTC            | Reverse primer to amplify T7 p- 5'UTR-AP2 for Gibson assembly of CIDEA mod mRNA template (lowercase overlaps with CIDEA <sub>126-184aa</sub> )                                                             |
| VP-171<br>(CIDEA <sub>126-184aa</sub> )                | CIDEA <sub>126-184aa</sub><br>3XHA_gibson <sub>FP</sub>                | aactcacaaaATGATTGCTAGGGTTACGTTTC                | Forward primer to amplify CIDEA <sub>126-184aa</sub> for Gibson assembly of CIDEA <sub>126-184aa</sub> mRNA template (lowercase overlaps with T7 p-5'UTR-AP2)                                              |
| VP-172<br>(CIDEA <sub>126-184aa</sub> )                | CIDEA <sub>126-184aa</sub><br>3XHA_gibson <sub>RP</sub>                | cgtatgggtaGGTCACTTGTGCGGAATATG                  | Reverse primer to amplify CIDEA <sub>126-184aa</sub> for Gibson assembly of CIDEA <sub>126-184aa</sub> mod mRNA template (lowercase overlaps with 3XHA-3'UTR fragment)                                     |

|                                         |                                           |                                         |                                                                                                                                                                        |
|-----------------------------------------|-------------------------------------------|-----------------------------------------|------------------------------------------------------------------------------------------------------------------------------------------------------------------------|
| VP-173<br>(CIDEA <sub>126-184aa</sub> ) | 3X-HA-3'UTR_gibson FP                     | acaagtgaccTACCCATACGATGTTCTCTG          | Forward primer to amplify 3XHA-3'UTR for Gibson assembly of CIDEA <sub>126-184aa</sub> mod mRNA template (lowercase overlaps with CIDEA <sub>126-184aa</sub> fragment) |
| VP-174<br>(CIDEA <sub>160-219aa</sub> ) | T7p-5'UTR-AP2_gibson_CIDEA RP             | ggatatccatTTTGTGAGTTTTCTAGGATTATTCCTC   | Reverse primer to amplify T7 p- 5'UTR-AP2 for Gibson assembly of CIDEA mod mRNA template (lowercase overlaps with CIDEA <sub>160-219aa</sub> )                         |
| VP-175<br>(CIDEA <sub>160-219aa</sub> ) | CIDEA <sub>160-219aa</sub> 3XHA_gibson FP | aactcacaaaATGGATATCCGGTGCACTGGAC        | Forward primer to amplify CIDEA <sub>160-219aa</sub> for Gibson assembly of CIDEA <sub>160-219aa</sub> mRNA template (lowercase overlaps with T7 p- 5'UTR-AP2)         |
| VP-176<br>(CIDEA <sub>71-160aa</sub> )  | T7p-5'UTR-AP2_gibson_CIDEA RP             | ccagaccatTTTGTGAGTTTTCTAGGATTATTCCTC    | Reverse primer to amplify T7 p- 5'UTR-AP2 for Gibson assembly of CIDEA mod mRNA template (lowercase overlaps with CIDEA <sub>71-160aa</sub> )                          |
| VP-177<br>(CIDEA <sub>71-160aa</sub> )  | CIDEA <sub>71-160aa</sub> 3XHA_gibson FP  | aactcacaaaATGGGTCTGGTGACCCTC            | Forward primer to amplify CIDEA <sub>71-160aa</sub> for Gibson assembly of CIDEA <sub>71-160aa</sub> mRNA template (lowercase overlaps with T7 p- 5'UTR-AP2)           |
| VP-178<br>(CIDEA <sub>71-160aa</sub> )  | CIDEA <sub>71-160aa</sub> 3XHA_gibson RP  | cgtatgggtaGTATGAAACGCTGTACATTCATACA TAG | Reverse primer to amplify CIDEA <sub>71-160aa</sub> for Gibson assembly of CIDEA <sub>71-160aa</sub> mod mRNA template (lowercase overlaps with 3XHA-3'UTR fragment)   |
| VP-179<br>(CIDEA <sub>71-160aa</sub> )  | 3X-HA-3'UTR_gibson FP                     | cgtttcatacTACCCATACGATGTTCTCTG          | Forward primer to amplify 3XHA-3'UTR for Gibson assembly of CIDEA <sub>71-160aa</sub> mod mRNA template (lowercase overlaps with CIDEA <sub>71-160aa</sub> fragment)   |
| VP-180<br>(CIDEA <sub>33-110aa</sub> )  | T7p-5'UTR-AP2_gibson_CIDEA RP             | gcctggccatTTTGTGAGTTTTCTAGGATTATTCCTC   | Reverse primer to amplify T7 p- 5'UTR-AP2 for Gibson assembly of CIDEA mod mRNA template (lowercase overlaps with CIDEA <sub>33-110aa</sub> )                          |
| VP-181<br>(CIDEA <sub>33-110aa</sub> )  | CIDEA <sub>33-110aa</sub> 3XHA_gibson FP  | aactcacaaaATGGCCAGGCCCTTCAGG            | Forward primer to amplify CIDEA <sub>33-110aa</sub> for Gibson assembly of CIDEA <sub>33-110aa</sub> mRNA template (lowercase overlaps with T7 p- 5'UTR-AP2)           |
| VP-182<br>(CIDEA <sub>33-110aa</sub> )  | CIDEA <sub>33-110aa</sub> 3XHA_gibson RP  | cgtatgggtaGGGCATCATTCTGGCC              | Reverse primer to amplify CIDEA <sub>33-110aa</sub> for Gibson assembly of CIDEA <sub>33-110aa</sub> mod mRNA template (lowercase overlaps with 3XHA-3'UTR fragment)   |
| VP-183<br>(CIDEA <sub>33-110aa</sub> )  | 3X-HA-3'UTR_gibson FP                     | atggatgccTACCCATACGATGTTCTCTG           | Forward primer to amplify 3XHA-3'UTR for Gibson assembly of CIDEA <sub>33-110aa</sub> mod mRNA template (lowercase overlaps with CIDEA <sub>33-110aa</sub> fragment)   |
| VP-184                                  | T7 pro- IVTT-FP                           | AACGACGCCAGTGAATTGTAATA                 | Forward primer to amplify T7-IRES-Kozak sequence from pT7CFE1 vector.                                                                                                  |
| VP-185                                  | T7-IRES-Kozak-RP                          | ATGGGTGGTGGCCATATTATCATC                | Reverse primer to amplify T7-IRES-Kozak sequence from pT7CFE1 vector                                                                                                   |

|        |                                               |                                                                        |                                                                                                                                                                                       |
|--------|-----------------------------------------------|------------------------------------------------------------------------|---------------------------------------------------------------------------------------------------------------------------------------------------------------------------------------|
| VP-186 | CIDEA (FL)-IVT <sub>-FP</sub>                 | gatgataaatggccaccaccatATG GAG GCC GCT<br>AGG GAC                       | Forward primer to amplify CIDEA-ORF to generate template for CIDEA invitro translation (IVT). (Lower case overlaps with T7-IRES-Kozak sequence)                                       |
| VP-187 | CIDEA (FL)-IVT <sub>-RP</sub>                 | TTT TTT TTT TTT TTT TTT TTT TTT TTT TCA<br>GCC GCA GGTGAACCT           | Reverse primer to amplify CIDEA-ORF to generate template for CIDEA invitro translation (IVT)                                                                                          |
| VP-188 | LXR $\alpha$ (FL)-IVT <sub>-FP</sub>          | gatgataaatggccaccaccatATGTCCTTGGGCTG<br>GGG                            | Forward primer to amplify LXR $\alpha$ -ORF to generate template for LXR $\alpha$ invitro translation (IVT). (Lower case overlaps with T7-IRES-Kozak sequence)                        |
| VP-189 | LXR $\alpha$ (FL)-IVT <sub>-RP</sub>          | TTT TTT TTT TTT TTT TTT TTT TTT TTT TCA<br>TTC GTG CAC ATC CCA G       | Reverse primer to amplify LXR $\alpha$ -ORF to generate template for LXR $\alpha$ invitro translation (IVT)                                                                           |
| VP-190 | RXR $\alpha$ (FL)-IVT <sub>-FP</sub>          | gatgataaatggccaccaccatATGGACCAAAACAT<br>TTCCTG                         | Forward primer to amplify RXR $\alpha$ $\alpha$ -ORF to generate template for RXR $\alpha$ $\alpha$ invitro translation (IVT). (Lower case overlaps with T7-IRES-Kozak sequence)      |
| VP-191 | RXR $\alpha$ $\alpha$ (FL)-IVT <sub>-RP</sub> | TTT TTT TTT TTT TTT TTT TTT TTT TTT CTA<br>AGT CAT TTG GTG CGG         | Reverse primer to amplify RXR $\alpha$ -ORF to generate template for RXR $\alpha$ invitro translation (IVT)                                                                           |
| VP-192 | PPAR $\gamma$ (FL)-IVT <sub>-FP</sub>         | gatgataaatggccaccaccatATGGTGACACGGA<br>AAGCC                           | Forward primer to amplify PPAR $\gamma$ -ORF to generate template for PPAR $\gamma$ invitro translation (IVT). (Lower case overlaps with T7-IRES-Kozak sequence)                      |
| VP-193 | PPAR $\gamma$ (FL)-IVT <sub>-RP</sub>         | TTT TTT TTT TTT TTT TTT TTT TTT TTT<br>TCAGTACATGCCCTGTAG              | Reverse primer to amplify PPAR $\gamma$ -ORF to generate template for PPAR $\gamma$ invitro translation (IVT)                                                                         |
| VP-194 | CIDEA <sub>1-70aa</sub> -IVT <sub>-FP</sub>   | gatgataaatggccaccaccat ATG GAG GCC GCT<br>AGG GAC                      | Forward primer to amplify CIDEA <sub>1-70aa</sub> to generate template for CIDEA <sub>1-70aa</sub> invitro translation (IVT). (Lower case overlaps with T7-IRES-Kozak sequence)       |
| VP-195 | CIDEA <sub>1-70aa</sub> -IVT <sub>-RP</sub>   | TTT TTT TTT TTT TTT TTT TTT TTT TTT<br>TCATGTTGCTATGACCAGCGC           | Reverse primer to amplify CIDEA <sub>1-70aa</sub> to generate template for CIDEA <sub>1-70aa</sub> invitro translation (IVT)                                                          |
| VP-196 | CIDEA <sub>1-160aa</sub> -IVT <sub>-FP</sub>  | gatgataaatggccaccaccat ATG GAG GCC GCT<br>AGG GAC TAT GCC              | Forward primer to amplify CIDEA <sub>1-160aa</sub> to generate template for CIDEA <sub>1-160aa</sub> invitro translation (IVT). (Lower case overlaps with T7-IRES-Kozak sequence)     |
| VP-197 | CIDEA <sub>1-160aa</sub> -IVT <sub>-RP</sub>  | TTT TTT TTT TTT TTT TTT TTT TTT TTT<br>TCAATCGTATGAAACGCTG             | Reverse primer to amplify CIDEA <sub>1-160aa</sub> to generate template for CIDEA <sub>1-160aa</sub> invitro translation (IVT)                                                        |
| VP-198 | CIDEA <sub>126-184aa</sub> -IVT-<br>FP        | gatgataaatggccaccaccat ATG ATT GCT AGG<br>GTT ACG                      | Forward primer to amplify CIDEA <sub>126-184aa</sub> to generate template for CIDEA <sub>126-184aa</sub> invitro translation (IVT). (Lower case overlaps with T7-IRES-Kozak sequence) |
| VP-199 | CIDEA <sub>126-184aa</sub> -IVT-<br>RP        | TTT TTT TTT TTT TTT TTT TTT TTT TTT TCA<br>GGT CAC TTG TGC GGA ATA TGA | Reverse primer to amplify CIDEA <sub>126-184aa</sub> to generate template for CIDEA <sub>126-184aa</sub> invitro translation (IVT)                                                    |

|        |                                                      |                                                                       |                                                                                                                                                                                                                           |
|--------|------------------------------------------------------|-----------------------------------------------------------------------|---------------------------------------------------------------------------------------------------------------------------------------------------------------------------------------------------------------------------|
| VP-200 | CIDEA <sub>160-219aa</sub> -IVT-FP                   | gatgataaatggccaccacccat ATG GAT ATC CCG<br>TGC ACT GGA C              | Forward primer to amplify CIDEA <sub>160-219aa</sub> to generate template for CIDEA <sub>160-219aa</sub> invitro translation (IVT). (Lower case overlaps with T7-IRES-Kozak sequence)                                     |
| VP-201 | CIDEA <sub>160-219aa</sub> -IVT-RP                   | TTT TTT TTT TTT TTT TTT TTT TTT TTT TCA<br>GCC GCA GGT GAA CCT GC     | Reverse primer to amplify CIDEA <sub>160-219aa</sub> to generate template for CIDEA <sub>160-219aa</sub> invitro translation (IVT)                                                                                        |
| VP-202 | CIDEA <sub>71-160aa</sub> -IVT-FP                    | gatgataaatggccaccacccat ATGGGT CTG GTG<br>ACC CTC G                   | Forward primer to amplify CIDEA <sub>71-160aa</sub> to generate template for CIDEA <sub>71-160aa</sub> invitro translation (IVT). (Lower case overlaps with T7-IRES-Kozak sequence)                                       |
| VP-203 | CIDEA <sub>71-160aa</sub> -IVT-RP                    | TTT TTT TTT TTT TTT TTT TTT TTT TTT TCA<br>GTA TGA AAC GCT GTA C      | Reverse primer to amplify CIDEA <sub>71-160aa</sub> to generate template for CIDEA <sub>71-160aa</sub> invitro translation (IVT)                                                                                          |
| VP-204 | CIDEA <sub>33-110aa</sub> -IVT-FP                    | gatgataaatggccaccacccat ATGGGT CTG GTG<br>ACC CTC G                   | Forward primer to amplify CIDEA <sub>33-110aa</sub> to generate template for CIDEA <sub>33-110aa</sub> invitro translation (IVT). (Lower case overlaps with T7-IRES-Kozak sequence)                                       |
| VP-205 | CIDEA <sub>33-110aa</sub> -IVT-RP                    | TTT TTT TTT TTT TTT TTT TTT TTT TTT TCA<br>GGG CAT CCA TTT CTG GCC    | Reverse primer to amplify CIDEA <sub>33-110aa</sub> to generate template for CIDEA <sub>33-110aa</sub> invitro translation (IVT)                                                                                          |
| VP-206 | CIDEA <sub>70-184aa</sub> -IVT-FP                    | gatgataaatggccaccacccat ATG ACA GGT CTG<br>GTG ACC CTC                | Forward primer to amplify CIDEA <sub>70-184aa</sub> to generate template for CIDEA <sub>70-184aa</sub> invitro translation (IVT). (Lower case overlaps with T7-IRES-Kozak sequence)                                       |
| VP-207 | CIDEA <sub>70-184aa</sub> -IVT-RP                    | TTT TTT TTT TTT TTT TTT TTT TTT TTT TCA<br>GGT CAC TTG TGC GG         | Reverse primer to amplify CIDEA <sub>70-184aa</sub> to generate template for CIDEA <sub>70-184aa</sub> invitro translation (IVT)                                                                                          |
| VP-208 | CIDEA <sub>(1-219Δ[55-63]Δ[166-175]aa)</sub> -IVT-FP | gatgataaatggccaccacccat ATG GAG GCC GCT<br>AGG GAC TAT GCC            | Forward primer to amplify CIDEA <sub>(1-219Δ[55-63]Δ[166-175]aa)</sub> to generate template for CIDEA <sub>(1-219Δ[55-63]Δ[166-175]aa)</sub> invitro translation (IVT). (Lower case overlaps with T7-IRES-Kozak sequence) |
| VP-209 | CIDEA <sub>(1-219Δ[55-63]Δ[166-175]aa)</sub> -IVT-RP | TTT TTT TTT TTT TTT TTT TTT TTT TTT TCA<br>GCC GCA GGT GAA CCT GCC    | Reverse primer to amplify CIDEA <sub>(1-219Δ[55-63]Δ[166-175]aa)</sub> to generate template for CIDEA <sub>(1-219Δ[55-63]Δ[166-175]aa)</sub> invitro translation (IVT)                                                    |
| VP-210 | LXRα <sub>1-96aa</sub> -IVT-FP                       | gatgataaatggccaccacccat atg TCC TTG TGG<br>CTG GGG GCC CCTG           | Forward primer to amplify LXRα <sub>1-96aa</sub> to generate template for LXRα <sub>1-96aa</sub> invitro translation (IVT). (Lower case overlaps with T7-IRES-Kozak sequence)                                             |
| VP-211 | LXRα <sub>1-96aa</sub> -IVT-RP                       | TTT TTT TTT TTT TTT TTT TTT TTT TTT tca<br>CTC GTT CCC CAG CAT TTT GG | Reverse primer to amplify LXRα <sub>1-96aa</sub> to generate template for LXRα <sub>1-96aa</sub> invitro translation (IVT)                                                                                                |
| VP-212 | LXRα <sub>97-200aa</sub> -IVT-FP                     | gatgataaatggccaccacccat atg CTA TGC AGC<br>GTG TGT GGG                | Forward primer to amplify LXRα <sub>97-200aa</sub> to generate template for LXRα <sub>97-200aa</sub> invitro translation (IVT). (Lower case overlaps with T7-IRES-Kozak sequence)                                         |



|                  |                                           |                                                                            |                                                                                                                                                                                                     |
|------------------|-------------------------------------------|----------------------------------------------------------------------------|-----------------------------------------------------------------------------------------------------------------------------------------------------------------------------------------------------|
| VP-213           | LXR $\alpha$ <sub>97-200aa</sub> -IVT-RP  | TTT TTT TTT TTT TTT TTT TTT TTT TTT tca<br>GGG GGG TGA GGA AGC CCT GG      | Reverse primer to amplify LXR $\alpha$ <sub>1-96aa</sub> to generate template for LXR $\alpha$ <sub>97-200aa</sub> invitro translation (IVT)                                                        |
| VP-214           | LXR $\alpha$ <sub>205-447aa</sub> -IVT-FP | gatgataaatggccaccacccat atg CAG CTC AGC<br>CCG GAA CAAC                    | Forward primer to amplify LXR $\alpha$ <sub>205-447aa</sub> to generate template for LXR $\alpha$ <sub>205-447aa</sub> invitro translation (IVT). (Lower case overlaps with T7-IRES-Kozak sequence) |
| VP-215           | LXR $\alpha$ <sub>205-447aa</sub> -IVT-RP | TTT TTT TTT TTT TTT TTT TTT TTT TTT tca<br>TTC GTG CAC ATC CCA GAT CTC     | Reverse primer to amplify LXR $\alpha$ <sub>205-447aa</sub> to generate template for LXR $\alpha$ <sub>205-447aa</sub> invitro translation (IVT)                                                    |
| VP-216           | LXR $\alpha$ <sub>215-434aa</sub> -IVT-FP | gatgataaatggccaccacccat atg GAG AAG CTC<br>GTC GCT GCC CAGC                | Forward primer to amplify LXR $\alpha$ <sub>215-434aa</sub> to generate template for LXR $\alpha$ <sub>215-434aa</sub> invitro translation (IVT). (Lower case overlaps with T7-IRES-Kozak sequence) |
| VP-217           | LXR $\alpha$ <sub>215-434aa</sub> -IVT-RP | TTT TTT TTT TTT TTT TTT TTT TTT TTT tca<br>CTT TTT GTC CTG CAG ACG CAG TGC | Reverse primer to amplify LXR $\alpha$ <sub>215-434aa</sub> to generate template for LXR $\alpha$ <sub>215-434aa</sub> invitro translation (IVT)                                                    |
| VP-218           | hUCP1 <sub>-6000+1</sub> -FP              | TTTTCTCCTTTTCACTCTCTGGTCCTTCC                                              | Forward primer to clone human UCP1 promoter (-6000+1) in BglIII compatible site on pGL3 basic vector                                                                                                |
| VP-219           | hUCP1 <sub>+1</sub> -RP                   | TCACGCCTGTCCGCCGGCAGCAAACCCG                                               | Reverse primer to clone human UCP1 promoter (-6000+1) in BglIII compatible site on pGL3 basic vector                                                                                                |
| VP-220           | hUCP1 <sub>-4000+1</sub> -FP              | GTGCATTTGTTAATGTGTTCTAC                                                    | Forward primer to clone human UCP1 promoter (-4000+1) in BglIII compatible site on pGL3 basic vector                                                                                                |
| VP-221           | hUCP1 <sub>-2800+1</sub> -FP              | AGTGAGTAAAGCAGAAGATAC                                                      | Forward primer to clone human UCP1 promoter (-2800+1) in BglIII compatible site on pGL3 basic vector                                                                                                |
| VP-222           | hUCP1 <sub>-1800+1</sub> -FP              | TGTAAGCACTACACAGGTGATAAC                                                   | Forward primer to clone human UCP1 promoter (-1800+1) in BglIII compatible site on pGL3 basic vector                                                                                                |
| VP-223           | hUCP1 <sub>-4000-2800</sub> -RP           | CTGCAACATTTGCTCTTGAGC                                                      | Reverse primer to clone human UCP1 promoter (-4000-2800) in BglIII compatible site on pGL3 basic vector                                                                                             |
| VP-224           | hUCP1 <sub>-3800-2800</sub> -FP           | CTCTCTCAACCTGAGGCAAACCTTCTCC                                               | Forward primer to clone human UCP1 promoter (-3800-2800) in BglIII compatible site on pGL3 basic vector                                                                                             |
| VP-225           | hUCP1 <sub>-4000-3850</sub> -RP           | GCACAAAGAAGAAGCAGAGAGG                                                     | Reverse primer to clone human UCP1 promoter (-4000-3850) in BglIII compatible site on pGL3 basic vector                                                                                             |
| VP-226           | Biotin-hUCP1 <sub>150bp</sub> -FP         | 5'Biotin-TEG...GTGCATTTGTTAATGTGTTCTACA<br>...3'                           | Forward primer to generate biotinylated 150bp human UCP1 distal promoter (-4000-3850) region                                                                                                        |
| VP-227           | Biotinylated DR1 oligo                    | 5'Biotin-TEG...GTTGCCCTTGCTCATACTGAC                                       | Probe for DNA-protein pull down assay                                                                                                                                                               |
| VP-228           | Biotinylated DR4 oligo                    | 5'Biotin-TEG...GCTACGTCATAAAGGGTCAG                                        | Probe for DNA-protein pull down assay                                                                                                                                                               |
| VP-229<br>VP-230 | ChIP-qPCR 1                               | ACATTCAGAACTTGCTGCCA.....FP<br>TAGGTCAAGTATGAGCAAGGGC.....RP               | ChIP-qPCR Primer sets targeting hUCP1 promoter (-4000-3850)                                                                                                                                         |

|                  |                        |                                                               |                                                             |
|------------------|------------------------|---------------------------------------------------------------|-------------------------------------------------------------|
| VP-230<br>VP-231 | ChIP-qPCR 2            | ATCATGTGCGAATGTATTGGG.....FP<br>TGCTGACCCCCTAACTCTC.....RP    | ChIP-qPCR Primer sets targeting hUCP1 promoter (-5708-5514) |
| VP-233<br>VP-234 | ChIP-qPCR 3            | CTTAGCCATCAGCCTCACAA...FP<br>AAAACCTACCGGATTGACTCT...RP       | ChIP-qPCR Primer sets targeting hUCP1 promoter (-2792-2598) |
| VP-235<br>VP-236 | ChIP-qPCR 4            | TGTTAGAGTCAAATCCGGTAGGTT...FP<br>GGGTCTGACCAGTGTCAAGT.....RP  | ChIP-qPCR Primer sets targeting hUCP1 promoter (-2403-2207) |
| VP-237<br>VP-238 | ChIP-qPCR 5            | AGGAAAGGCCACACAACCAA...FP<br>AGAGCTAGCCCAGGTCTGAA...RP        | ChIP-qPCR Primer sets targeting hUCP1 promoter (-1132-938)  |
| VP-239<br>VP-240 | ChIP-qPCR 6            | AGTGATGAAACGAAACGCTCT...FP<br>CTTGAAGAATCCCACACAGGA...RP      | ChIP-qPCR Primer sets targeting hUCP1 promoter (-840-646)   |
| VP-241<br>VP-242 | ChIP-qPCR 7            | GTCTGGGAGTTGGAGGAATG...FP<br>AAAGTTCTGCCTAGCTGGA.....RP       | ChIP-qPCR Primer sets targeting hUCP1 promoter (-646-452)   |
| VP-243<br>VP-244 | qRT-PCR –PGC1 $\alpha$ | TCTGAGTCTGTATGGAGTGACAT...FP<br>CCAAGTCGTTACATCTAGTTCA.....RP | PrimerBank ID : 116284374c1                                 |
| VP-245<br>VP-246 | qRT-PCR –PGC1 $\beta$  | GATGCCAGCGACTTTGACTC.....FP<br>ACCCACGTCATCTTCAGGGA.....RP    | PrimerBank ID 289577089c1                                   |
| VP-247<br>VP-248 | qRT-PCR –<br>PRDM16    | CTTCGGATGGGAGCAAATACTG...FP<br>TCCACGCAGAAGTTCTCACTG.....RP   | PrimerBank ID 289547570c2                                   |
| VP-249<br>VP-250 | qRT-PCR –CEBPB         | CTTCAGCCCCTACCTGGAG.....FP<br>GGAGAGGAAGTCGTGGTGC...RP        | PrimerBank ID 28872796a1                                    |
| VP-251<br>VP-252 | qRT-PCR –DIO2          | AGCAGACTACTGGTCTACTCAC...FP<br>CACAGACTAATTTGCCTTGGGA...RP    | PrimerBank ID 10863067a1                                    |
| VP-253<br>VP-254 | qRT-PCR –ELOVL3        | CTGTTCCAGCCCTATAACTTCG...FP<br>GAATGAGTTGCCCAATACTCC...RP     | PrimerBank ID 23097309c1                                    |
| VP-255<br>VP-256 | qRT-PCR –UCP1          | AGGTCCAAGGTGAATGCC...FP<br>TTACCACAGCGGTGATTGTT...FP          | PrimerBank ID 194733736c1                                   |
| VP-257<br>VP-258 | qRT-PCR –P2RX5         | ACCCTCACTATCTTTTAGCCGT...FP<br>CAAATCTGAAGTTGTACCCGGAG...RP   | PrimerBank ID 325197204c3                                   |
| VP-259<br>VP-260 | qRT-PCR –CITED1        | GCTGGCTAGTATGCACCTGC...FP<br>CATTGGCTCGGTCCAACCC...RP         | PrimerBank ID 222136685c2                                   |
| VP-261<br>VP-262 | qRT-PCR –CD137         | TTGGATGGAAAGTCTGTGCTTG...FP<br>AGGAGATGATCTGCGGAGAGT...RP     | PrimerBank ID 315259099c3                                   |
| VP-263<br>VP-264 | qRT-PCR –TBX1          | ACGACAACGGCCACATTATTC...FP<br>CCTCGGCATATTTCTCGTATCT...RP     | PrimerBank ID 18104949c1                                    |
| VP-265<br>VP-266 | qRT-PCR –<br>TMEM26    | TGAGACGGCCAAAGTTTTTGT...FP<br>TGGGTAGAAGCCATCTTCCA...RP       | PrimerBank ID 197383944c2                                   |
| VP-267<br>VP-268 | qRT-PCR –MTUS1         | TTGACAAATTGAAGCGTTTCCAG...FP<br>CTGCCTTGAGATTGCCATGTG...RP    | PrimerBank ID 262050665c2                                   |
| VP-269<br>VP-270 | qRT-PCR –KCNK3         | CTACGAGCACTGGACCTTCT...FP<br>CGTAAGGATGTAGACGAAGCTGA...RP     | PrimerBank ID 197245365c1                                   |
| VP-271<br>VP-272 | qRT-PCR –LHX8          | AAGGGGAATGTCTATCACTTGGC...FP<br>TTCCACCAAAGCAAACCTCTC...RP    | PrimerBank ID 368711325c2                                   |
| VP-273<br>VP-274 | qRT-PCR –ZIC1          | TGGCCCCGAGCAGAGTAAT...FP<br>CCCTGTGTGCGTCTTTTGT...RP          | PrimerBank ID 70778758c3                                    |
| VP-275<br>VP-276 | qRT-PCR –EBF3          | AACAGGCCATCGTCTACGAG...FP<br>GGCGTTTCGTTTCTATTGCCA...RP       | PrimerBank ID 347658909c3                                   |
| VP-277<br>VP-278 | qRT-PCR –PAT2          | TGGGGAAGGCATATCGTGAG...FP<br>TGGAATAGCAGTTGTTGGTTGTG...RP     | PrimerBank ID 222418630c2                                   |
| VP-279<br>VP-280 | qRT-PCR –FBXO31        | CCACGTCGATGACCCATGAG...FP<br>GCCGTACATGCACCTCACT...RP         | PrimerBank ID 217272875c2                                   |
| VP-281           | qRT-PCR –mir206        | CTTCCGAGGCCACATGCTT...FP                                      | NCBI/ Primer-BLAST                                          |

|                  |                                      |                                                              |                           |
|------------------|--------------------------------------|--------------------------------------------------------------|---------------------------|
| VP-282           |                                      | CACTTGCCGAAACCACACT...FP                                     |                           |
| VP-283<br>VP-284 | qRT-PCR –mir133b                     | GAAGAAAGATGCCCCCTGCTC...FP<br>TGAAGGGGACCAAACCTCTC...RP      | NCBI/ Primer-BLAST        |
| VP-285<br>VP-286 | qRT-PCR –LEP                         | TGCCTTCAGAAACGTGATCC...FP<br>CTCTGTGGAGTAGCCTGAAGC...RP      | PrimerBank ID 169790920c1 |
| VP-287<br>VP-288 | qRT-PCR –HOXC8                       | TCCGCCAACACTAACAGTAGC...FP<br>AGCGTGGGGTCTCATCCAT...RP       | PrimerBank ID 45580721c3  |
| VP-289<br>VP-290 | qRT-PCR –HOXC9                       | ATGTATTTAACAGGGACCGTCG...FP<br>GCTCCTTGTCGGTTTTCTCTTT...RP   | PrimerBank ID 24497546c3  |
| VP-291<br>VP-292 | qRT-PCR –DPT                         | GGGGCCAGTATGGCGATTATG...FP<br>CGGTTCAAATCACCCACCC...RP       | PrimerBank ID 299758400c1 |
| VP-293<br>VP-294 | qRT-PCR –PPAR $\gamma$               | ACCAAAGTGCAATCAAAGTGGA...FP<br>ATGAGGGAGTTGGAAGGCTCT...RP    | PrimerBank ID 116284372c2 |
| VP-295<br>VP-296 | qRT-PCR –ADIPOQ                      | AACATGCCCATTCGCTTTACC...FP<br>TAGGCAAAGTAGTACAGCCA...RP      | PrimerBank ID 295317371c3 |
| VP-297<br>VP-298 | qRT-PCR –FABP3                       | CATGACCAAGCCTACCACAAT...FP<br>CCCCAACTTAAAGCTGATCTCTG...RP   | PrimerBank ID 62865867c2  |
| VP-299<br>VP-300 | qRT-PCR –FABP4                       | ACTGGGCCAGGAATTTGACG...FP<br>CTCGTGAAGTGACGCCTT...RP         | PrimerBank ID 168480125c1 |
| VP-301<br>VP-302 | qRT-PCR –RXRA                        | GACGGAGCTTGTGTCCAAGAT.....FP<br>AGTCAGGGTTAAAGAGGACGAT...RP  | PrimerBank ID 207028087c3 |
| VP-303<br>VP-304 | qRT-PCR –FASN                        | AAGGACCTGTCTAGGTTTGATGC..FP<br>TGGCTTCATAGGTGACTTCCA.....RP  | PrimerBank ID 41872630c1  |
| VP-305<br>VP-306 | qRT-PCR –SCD1                        | TTCTACCTGCAAGTTTACACC...FP<br>CCGAGCTTTGTAAGAGCGGT.....RP    | PrimerBank ID 53759150c3  |
| VP-307<br>VP-308 | qRT-PCR –<br>FSP27 <sub>CIDEc</sub>  | CAGCAGCTCCTCGATGCTAC.....FP<br>TCAGACAGGTCGGGATAAGGG.....RP  | PrimerBank ID 313850982c3 |
| VP-309<br>VP-310 | qRT-PCR –PLIN1                       | TGGGTGGTGTGGCACATAC.....FP<br>CCTCCCCTGGTTGAGGAGA.....RP     | PrimerBank ID 223718195c2 |
| VP-311<br>VP-312 | qRT-PCR –<br>ATGL <sub>PNPLA2</sub>  | ATGGTGGCATTTCAGACAACC.....FP<br>CGGACAGATGTCACTCTCGC.....RP  | PrimerBank ID 300796746c2 |
| VP-313<br>VP-314 | qRT-PCR –GOS2                        | GCCGTGCCACTAAGGTCATT.....FP<br>GATCAGCTCCTGGACCGTTT.....RP   | NCBI/ Primer-BLAST        |
| VP-315<br>VP-316 | qRT-PCR –MDH2                        | GCCATGATCTGCGTCATTGC.....FP<br>CCGAAGATTTTGTGGGGTTGT....RP   | PrimerBank ID 21735620c3  |
| VP-317<br>VP-318 | qRT-PCR –IDH3A                       | CCCGCTGGATCTCTAAGG.....FP<br>AATTTCTGGGCCAATACCATCTC..RP     | PrimerBank ID 28178835c1  |
| VP-319<br>VP-320 | qRT-PCR –ACO2                        | CCCTACAGCCTACTGGTGACT.....FP<br>TGTA CTGTTGGGCTCAAAGT.....RP | PrimerBank ID 46411160c1  |
| VP-321<br>VP-322 | qRT-PCR –PPARA                       | ATGGTGGACACGGAAAGCC.....FP<br>CGATGGATTGCGAAATCTCTTGG.RP     | PrimerBank ID 61744436c1  |
| VP-323<br>VP-324 | qRT-PCR –CPT1                        | TCCAGTTGGCTTATCGTGGTG.....FP<br>TCCAGAGTCCGATTGATTTTTGC...RP | PrimerBank ID 188595713c1 |
| VP-325<br>VP-326 | qRT-PCR –CPT2                        | CTGGAGCCAGAAGTGTCCAC.....FP<br>AGGCACAAAGCGTATGAGTCT.....RP  | PrimerBank ID 169790951c2 |
| VP-327<br>VP-328 | qRT-PCR –<br>VLCAD <sub>ACADVL</sub> | ACAGATCAGGTGTTCCCATACC.....FP<br>CTTGGCGGGATCGTTCACTT.....RP | PrimerBank ID 76496473c1  |
| VP-329<br>VP-330 | qRT-PCR –<br>LCAD <sub>ACADL</sub>   | TGCAATAGCAATGACAGAGCC.....FP<br>CGCAACTACAATCACAACATCAC...RP | PrimerBank ID 188497706c2 |

|                  |                                      |                                                                |                             |
|------------------|--------------------------------------|----------------------------------------------------------------|-----------------------------|
| VP-331<br>VP-332 | qRT-PCR –<br>MCAD <sub>ACADM</sub>   | TGGATAACCAACGGAGGAAAAG....FP<br>CTGGGGTATCTGCTTCCACA.....RP    | PrimerBank ID 187960096c2   |
| VP-333<br>VP-334 | qRT-PCR –NDUFS1                      | TGGAAGACAAGAACATTGGGC.....FP<br>GCAAACCTGATGCAGCGAG.....RP     | PrimerBank ID 316983153c2   |
| VP-335<br>VP-336 | qRT-PCR –NDUFS2                      | GTCCGATTGCCGATTCAGC.....FP<br>GCTTGGGTACATAACAGTCC.....RP      | PrimerBank ID 260898742c1   |
| VP-337<br>VP-338 | qRT-PCR –NDUFS3                      | ACTGTCAGACCACGGAATGAT.....FP<br>GGGCAAGATTTCAAGCCACATAC....RP  | PrimerBank ID 226423900c1   |
| VP-339<br>VP-340 | qRT-PCR –NDUFB8                      | ACAGGAACCGTGTGGATACAT.....FP<br>CCCCACCCAGCACATGAAT.....RP     | PrimerBank ID 56676316c2    |
| VP-341<br>VP-342 | qRT-PCR –SDHA                        | TGGCATTCTACGACACCGTG.....FP<br>GCCTGCTCCGTATGTAGTG.....RP      | PrimerBank ID 156416002c3   |
| VP-343<br>VP-344 | qRT-PCR –SDHB                        | ACCTTCGAAGATCATGCAGA.....FP<br>GTGCAAGCTAGAGTGTTCCT.....RP     | PrimerBank ID 115387093c2   |
| VP-345<br>VP-346 | qRT-PCR –<br>UQCRC2                  | AATTCGTCGTTGGGAAGTAGC.....FP<br>ATGAGTCTGCGGATTCGAAAG.....RP   | PrimerBank ID 50592987c3    |
| VP-347<br>VP-348 | qRT-PCR –UQCRH                       | GAGGACGAGCAAAGATGCTT.....FP<br>CGAGAGGAATCACGCTCATCA.....RP    | PrimerBank ID 5174745a1     |
| VP-349<br>VP-350 | qRT-PCR –COX4I1                      | CAGGGTATTTAGCCTAGTTGGC.....FP<br>GCCGATCCATATAAGCTGGGA.....RP  | PrimerBank ID 325301085c1   |
| VP-351<br>VP-352 | qRT-PCR –COX7C                       | GGTCCGTAGGAGCCACTATGA.....FP<br>GTGTCTTACTACAAGGAAGGGTG...RP   | PrimerBank ID 18105039c1    |
| VP-353<br>VP-354 | qRT-PCR –COX5B                       | TGTGAAGAGGACAATACCAGCG.....FP<br>CCAGCTTGTAATGGGCTCCAC.....RP  | PrimerBank ID 17017987c2    |
| VP-355<br>VP-356 | qRT-PCR –COX8A                       | GCCAAGATCCATTGTTGCC.....FP<br>CTCTGGCCTCCTGTAGGTCT.....RP      | PrimerBank ID 4758044a1     |
| VP-357<br>VP-358 | qRT-PCR –ATP5A1                      | GTATTGCCCGCTACATGG.....FP<br>AGGACATACCCTTTAAGCCTGA.....RP     | PrimerBank ID 382546178c1   |
| VP-359<br>VP-360 | qRT-PCR –ATP5G2                      | CCCTCCTGGTCAAGAGCAC.....FP<br>GTATCTCCGGTCTTTACGA.....RP       | PrimerBank ID 85794864c1    |
| VP-361<br>VP-362 | qRT-PCR –ATP5B                       | AAACAATTTGCTCCATTTCATGC....FP<br>GACAACCTTGATACCAGTCACC.....RP | PrimerBank ID 50345985c2    |
| VP-363<br>VP-364 | qRT-PCR –<br>CIDEA <sub>Exon 2</sub> | TAAGCGAGTCTGTTCACCC.....FP<br>GGCTGCTCCTGTCATGGTT.....RP       | NCBI/ Primer-BLAST          |
| VP-365<br>VP-366 | qRT-PCR –<br>CIDEA <sub>Exon 3</sub> | ACTCTGGATGCCCTCGTCAT.....FP<br>ACTCTTCTGTGCCACCACG.....RP      | NCBI/ Primer-BLAST          |
| VP-367<br>VP-368 | qRT-PCR –<br>CIDEA <sub>Exon 4</sub> | CCGAAGAGGTCGGGAATAGC.....FP<br>TTCACGTTAAGGCAGCCGAT.....RP     | NCBI/ Primer-BLAST          |
| VP-369<br>VP-370 | qRT-PCR –<br>CIDEA <sub>Exon 5</sub> | AGGTGACGGGACAGTTTCTC.....FP<br>GATGGCCGCTCTTCTTGT.....RP       | NCBI/ Primer-BLAST          |
| VP-371<br>VP-372 | qRT-PCR –CIDEA <sub>FL</sub>         | CTTGGGAGACAACACGCATTT.....FP<br>TCTCGCTATTTCCCGACCTCT.....RP   | PrimerBank ID 156523971c3   |
| VP-373           | qRT-PCR –HOXC9                       |                                                                |                             |
| VP-374           | β2-M                                 | GCTGGGTAGCTCTAAACAATGTAT<br>TCA                                | CCATGTACTAACAATGTCTAAAATGGT |
| VP-375           | Mt-D-Loop                            |                                                                | CTAAATAGCCACACGTTCCC        |
